# Supplementary material for: Distribution and current infection status of Biomphalaria straminea in Hong Kong
Source: PubMed Central journal article supplement (PMC5526268; doi:10.1186/s13071-017-2285-3), 2017-07-25

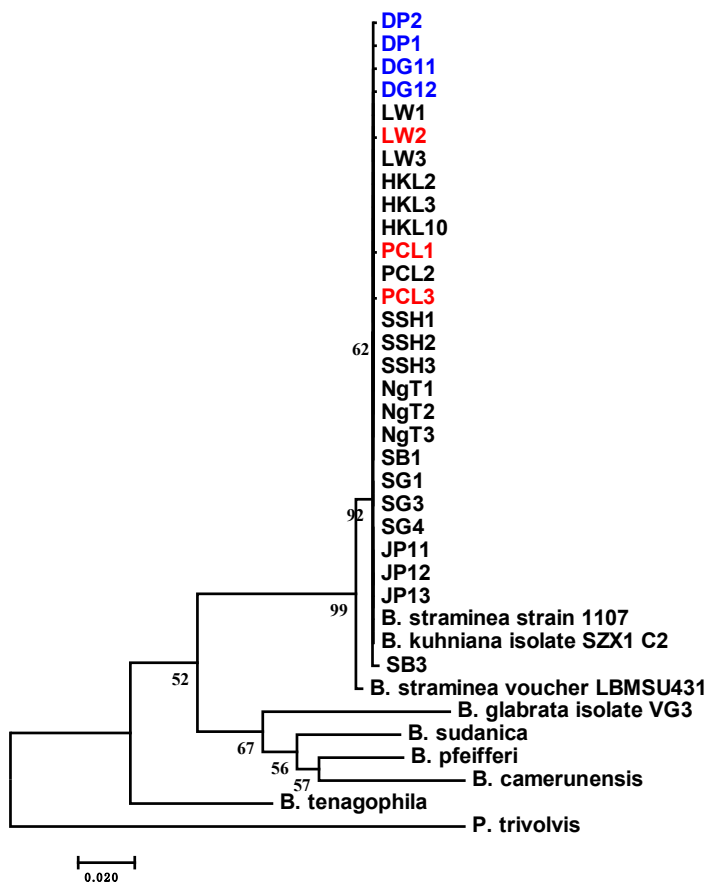

Supplement: 13071_2017_2285_MOESM1_ESM.pdf [file 13071_2017_2285_MOESM1_ESM.pdf]
